# Supplementary material
Source: MDPI journal article supplement (https://www.mdpi.com/2073-4441/14/17/2681)
Supplement: s1 [file s1]

**Table S1: experimental programm**

| <b><u>batch reactor</u></b>       |                 |                               |                                                           |                                |
|-----------------------------------|-----------------|-------------------------------|-----------------------------------------------------------|--------------------------------|
| number                            | volume [l]      | LED-power [W/m <sup>2</sup> ] | volumensepz.<br>Bestrahlungsleistung [kW/m <sup>3</sup> ] | treatment time [min]           |
| 1.1                               | 0.50            | 99.94                         | 3.08                                                      | 90                             |
| 1.2                               | 0.50            | 199.88                        | 6.15                                                      | 90                             |
| 1.3                               | 0.50            | 299.82                        | 9.23                                                      | 90                             |
| <b><u>rotary body reactor</u></b> |                 |                               |                                                           |                                |
| number                            | flow rate [l/h] | LED-power [W/m <sup>2</sup> ] | volumensepz.<br>Bestrahlungsleistung [kW/m <sup>3</sup> ] | hydraulic retention time [min] |
| 2.1                               | 25.10           | 87.83                         | 4.29                                                      | 59.76                          |
| 2.2                               | 23.40           | 197.89                        | 9.67                                                      | 64.10                          |
| 2.3                               | 23.50           | 303.72                        | 14.84                                                     | 63.83                          |
| <b><u>flatcell reactor</u></b>    |                 |                               |                                                           |                                |
| number                            | flow rate [l/h] | LED-power [W/m <sup>2</sup> ] | volumensepz.<br>Bestrahlungsleistung [kW/m <sup>3</sup> ] | hydraulic retention time [min] |
| 3.1                               | 0.99            | 159.12                        | 14.40                                                     | 12.17                          |
| 3.2                               | 0.99            | 318.23                        | 28.80                                                     | 12.17                          |
| 3.3                               | 0.99            | 477.35                        | 43.20                                                     | 12.17                          |
| 3.4                               | 0.99            | 636.46                        | 57.60                                                     | 12.17                          |

Table S2: Concentrations

**laboratory batch**

| experiment variant | sample type | date       | flow rate [l/h] | irradiation power [W/m <sup>2</sup> ] | amisulpride | benzotriazole | candesartan | carbamazepine | diclofenac | gabapentin | 1-methyl-benzotriazole | metoprolol |
|--------------------|-------------|------------|-----------------|---------------------------------------|-------------|---------------|-------------|---------------|------------|------------|------------------------|------------|
| 1.1                | start A     | 12.02.2022 | -               | 99.94                                 | 386         | 3200          | 2640        | 422           | 1830       | 4510       | 496                    | 1090       |
| 1.1                | start B     | 12.02.2022 | -               | 99.94                                 | 382         | 3490          | 2730        | 428           | 2100       | 4530       | 513                    | 1050       |
| 1.1                | 15 min A    | 12.02.2022 | -               | 99.94                                 | 344         | 2650          | 2450        | 405           | 1560       | 4300       | 403                    | 995        |
| 1.1                | 15 min B    | 12.02.2022 | -               | 99.94                                 | 328         | 2460          | 2510        | 390           | 1490       | 4300       | 407                    | 1020       |
| 1.1                | 30 min A    | 12.02.2022 | -               | 99.94                                 | 306         | 1570          | 2160        | 352           | 1090       | 3910       | 312                    | 870        |
| 1.1                | 30 min B    | 12.02.2022 | -               | 99.94                                 | 302         | 1510          | 2150        | 290           | 1060       | 3960       | 310                    | 885        |
| 1.1                | 45 min A    | 12.02.2022 | -               | 99.94                                 | 252         | 1110          | 1920        | 276           | 774        | 3690       | 228                    | 815        |
| 1.1                | 45 min B    | 12.02.2022 | -               | 99.94                                 | 276         | 1070          | 1920        | 258           | 756        | 3630       | 230                    | 770        |
| 1.1                | 60 min A    | 12.02.2022 | -               | 99.94                                 | 250         | 692           | 1720        | 276           | 450        | 3470       | 162                    | 680        |
| 1.1                | 60 min B    | 12.02.2022 | -               | 99.94                                 | 246         | 702           | 1730        | 217           | 514        | 3490       | 162                    | 691        |
| 1.1                | 75 min A    | 12.02.2022 | -               | 99.94                                 | 210         | 456           | 1480        | 124           | 350        | 3010       | 109                    | 552        |
| 1.1                | 75 min B    | 12.02.2022 | -               | 99.94                                 | 210         | 416           | 1430        | 137           | 392        | 3020       | 114                    | 556        |
| 1.1                | 90 min A    | 12.02.2022 | -               | 99.94                                 | 176         | 318           | 1230        | 71            | 238        | 2700       | 80                     | 490        |
| 1.1                | 90 min B    | 12.02.2022 | -               | 99.94                                 | 193         | 278           | 1270        | 103           | 238        | 2750       | 78                     | 485        |
| 1.2                | start A     | 12.02.2022 | -               | 199.88                                | 308         | 3040          | 2710        | 430           | 1730       | 4860       | 503                    | 1090       |
| 1.2                | start B     | 12.02.2022 | -               | 199.88                                | 308         | 3250          | 2500        | 471           | 1770       | 4790       | 512                    | 1100       |
| 1.2                | 15 min A    | 12.02.2022 | -               | 199.88                                | 308         | 2180          | 2210        | 281           | 1430       | 4130       | 380                    | 850        |
| 1.2                | 15 min B    | 12.02.2022 | -               | 199.88                                | 306         | 2020          | 2140        | 214           | 1430       | 4000       | 378                    | 835        |
| 1.2                | 30 min A    | 12.02.2022 | -               | 199.88                                | 276         | 1090          | 1820        | 138           | 702        | 3330       | 248                    | 558        |
| 1.2                | 30 min B    | 12.02.2022 | -               | 199.88                                | 256         | 1100          | 1790        | 74            | 676        | 3080       | 255                    | 560        |
| 1.2                | 45 min A    | 12.02.2022 | -               | 199.88                                | 226         | 542           | 1490        | 294           | 384        | 2460       | 161                    | 389        |
| 1.2                | 45 min B    | 12.02.2022 | -               | 199.88                                | 222         | 532           | 1510        | 298           | 404        | 2400       | 149                    | 400        |
| 1.2                | 60 min A    | 12.02.2022 | -               | 199.88                                | 174         | 662           | 1230        | 244           | 238        | 2130       | 99                     | 359        |
| 1.2                | 60 min B    | 12.02.2022 | -               | 199.88                                | 186         | 646           | 1210        | 228           | 256        | 2140       | 101                    | 363        |
| 1.2                | 75 min A    | 12.02.2022 | -               | 199.88                                | 144         | 310           | 912         | 174           | 110        | 1770       | 58                     | 269        |
| 1.2                | 75 min B    | 12.02.2022 | -               | 199.88                                | 138         | 336           | 908         | 170           | 125        | 1740       | 59                     | 234        |
| 1.2                | 90 min A    | 12.02.2022 | -               | 199.88                                | 108         | 172           | 758         | 131           | 78         | 1240       | 33                     | 192        |
| 1.2                | 90 min B    | 12.02.2022 | -               | 199.88                                | 116         | 158           | 742         | 123           | 86         | 1170       | 32                     | 176        |
| 1.3                | start A     | 12.02.2022 | -               | 299.82                                | 364         | 4980          | 2790        | 267           | 2520       | 3590       | 522                    | 810        |
| 1.3                | start B     | 12.02.2022 | -               | 299.82                                | 368         | 4920          | 2780        | 248           | 2450       | 3510       | 515                    | 795        |
| 1.3                | 15 min A    | 12.02.2022 | -               | 299.82                                | 239         | 1390          | 2180        | 117           | 1090       | 2860       | 314                    | 589        |
| 1.3                | 15 min B    | 12.02.2022 | -               | 299.82                                | 236         | 1390          | 2080        | 131           | 1170       | 2820       | 320                    | 575        |
| 1.3                | 30 min A    | 12.02.2022 | -               | 299.82                                | 210         | 886           | 1590        | 292           | 722        | 2330       | 200                    | 471        |
| 1.3                | 30 min B    | 12.02.2022 | -               | 299.82                                | 208         | 892           | 1530        | 304           | 688        | 2150       | 202                    | 467        |
| 1.3                | 45 min A    | 12.02.2022 | -               | 299.82                                | 166         | 500           | 1220        | 204           | 378        | 1760       | 113                    | 359        |

|     |          |            |   |        |     |     |      |     |      |      |      |     |
|-----|----------|------------|---|--------|-----|-----|------|-----|------|------|------|-----|
| 1.3 | 45 min B | 12.02.2022 | - | 299.82 | 169 | 456 | 1190 | 202 | 322  | 1770 | 114  | 303 |
| 1.3 | 60 min A | 12.02.2022 | - | 299.82 | 124 | 222 | 758  | 137 | 174  | 1320 | 57   | 192 |
| 1.3 | 60 min B | 12.02.2022 | - | 299.82 | 115 | 254 | 757  | 129 | 153  | 1260 | 58   | 198 |
| 1.3 | 75 min A | 12.02.2022 | - | 299.82 | 80  | 82  | 532  | 77  | 71   | 880  | 27   | 117 |
| 1.3 | 75 min B | 12.02.2022 | - | 299.82 | 80  | 89  | 536  | 76  | 63   | 865  | 27   | 120 |
| 1.3 | 90 min A | 12.02.2022 | - | 299.82 | 60  | 23  | 384  | 49  | n.b. | 615  | n.b. | 78  |
| 1.3 | 90 min B | 12.02.2022 | - | 299.82 | 64  | 24  | 390  | 51  | n.b. | 628  | n.b. | 68  |

#### semi technical RTK

| experiment variant | sample type  | date       | flow rate [l/h] | irradiation power [W/m <sup>2</sup> ] | amisulpride | benzotriazole | candesartan | carbamazepine | diclofenac | gabapentin | 1-methyl-benzotriazole | metoprolol |
|--------------------|--------------|------------|-----------------|---------------------------------------|-------------|---------------|-------------|---------------|------------|------------|------------------------|------------|
| 2.1                | influent A   | 12.01.2021 | 25.10           | 87.83                                 | 611         | 5250          | 2440        | 1490          | 3690       | 5440       | 1880                   | 958        |
| 2.1                | influent B   | 12.01.2021 | 25.10           | 87.83                                 | 672         | 5270          | 2500        | 1550          | 3740       | 5660       | 1970                   | 928        |
| 2.1                | cascade 2 A  | 12.01.2021 | 25.10           | 87.83                                 | 597         | 5270          | 2360        | 1450          | 2710       | 6190       | 2010                   | 901        |
| 2.1                | cascade 2 B  | 12.01.2021 | 25.10           | 87.83                                 | 617         | 5210          | 2410        | 1490          | 2650       | 6160       | 2160                   | 950        |
| 2.1                | cascade 4 A  | 12.01.2021 | 25.10           | 87.83                                 | 552         | 5270          | 2260        | 1400          | 2030       | 5700       | 1940                   | 855        |
| 2.1                | cascade 4 B  | 12.01.2021 | 25.10           | 87.83                                 | 582         | 5740          | 2340        | 1400          | 2020       | 5740       | 2010                   | 884        |
| 2.1                | cascade 6 A  | 12.01.2021 | 25.10           | 87.83                                 | 545         | 5450          | 2130        | 1330          | 1750       | 5470       | 1880                   | 827        |
| 2.1                | cascade 6 B  | 12.01.2021 | 25.10           | 87.83                                 | 506         | 5260          | 2150        | 1300          | 1610       | 5540       | 1900                   | 850        |
| 2.1                | cascade 8 A  | 12.01.2021 | 25.10           | 87.83                                 | 511         | 5030          | 2080        | 1280          | 1160       | 5300       | 1840                   | 812        |
| 2.1                | cascade 8 B  | 12.01.2021 | 25.10           | 87.83                                 | 486         | 5090          | 2020        | 1220          | 1070       | 4980       | 1730                   | 750        |
| 2.1                | cascade 10 A | 12.01.2021 | 25.10           | 87.83                                 | 434         | 4250          | 1720        | 1080          | 811        | 4480       | 1540                   | 629        |
| 2.1                | cascade 10 B | 12.01.2021 | 25.10           | 87.83                                 | 436         | 4510          | 1810        | 1150          | 862        | 4710       | 1660                   | 673        |
| 2.1                | cascade 12 A | 12.01.2021 | 25.10           | 87.83                                 | 416         | 4220          | 1660        | 1040          | 668        | 4170       | 1440                   | 601        |
| 2.1                | cascade 12 B | 12.01.2021 | 25.10           | 87.83                                 | 429         | 3380          | 1820        | 1110          | 741        | 3790       | 1530                   | 617        |
| 2.2                | influent A   | 12.01.2021 | 23.40           | 197.89                                | 515         | 3080          | 2250        | 1280          | 3390       | 3910       | 1120                   | 638        |
| 2.2                | influent B   | 12.01.2021 | 23.40           | 197.89                                | 517         | 3020          | 2260        | 1250          | 3120       | 3700       | 1140                   | 620        |
| 2.2                | cascade 2 A  | 12.01.2021 | 23.40           | 197.89                                | 521         | 4890          | 2290        | 1210          | 2280       | 3350       | 1930                   | 747        |
| 2.2                | cascade 2 B  | 12.01.2021 | 23.40           | 197.89                                | 541         | 5060          | 2270        | 1290          | 2090       | 3580       | 2010                   | 767        |
| 2.2                | cascade 4 A  | 12.01.2021 | 23.40           | 197.89                                | 437         | 4380          | 1970        | 1060          | 1410       | 3120       | 1760                   | 620        |
| 2.2                | cascade 4 B  | 12.01.2021 | 23.40           | 197.89                                | 469         | 4370          | 1990        | 1080          | 1400       | 3170       | 1740                   | 627        |
| 2.2                | cascade 6 A  | 12.01.2021 | 23.40           | 197.89                                | 402         | 3910          | 1760        | 958           | 961        | 2950       | 1500                   | 504        |
| 2.2                | cascade 6 B  | 12.01.2021 | 23.40           | 197.89                                | 385         | 3900          | 1770        | 1020          | 1030       | 2830       | 1570                   | 572        |
| 2.2                | cascade 8 A  | 12.01.2021 | 23.40           | 197.89                                | 325         | 3220          | 1490        | 835           | 662        | 2450       | 1270                   | 452        |
| 2.2                | cascade 8 B  | 12.01.2021 | 23.40           | 197.89                                | 320         | 3010          | 1600        | 894           | 619        | 2570       | 1300                   | 480        |
| 2.2                | cascade 10 A | 12.01.2021 | 23.40           | 197.89                                | 296         | 2890          | 1440        | 821           | 499        | 2550       | 1210                   | 430        |
| 2.2                | cascade 10 B | 12.01.2021 | 23.40           | 197.89                                | 276         | 2560          | 1410        | 821           | 526        | 2520       | 1220                   | 421        |
| 2.2                | cascade 12 A | 12.01.2021 | 23.40           | 197.89                                | 234         | 2010          | 1170        | 662           | 320        | 2160       | 952                    | 338        |
| 2.2                | cascade 12 B | 12.01.2021 | 23.40           | 197.89                                | 251         | 2300          | 1130        | 676           | 325        | 2170       | 973                    | 334        |
| 2.3                | influent A   | 14.01.2021 | 23.50           | 303.72                                | 662         | 6090          | 2390        | 1540          | 2960       | 6730       | 2140                   | 846        |

|     |              |            |       |        |     |      |      |      |      |      |      |     |
|-----|--------------|------------|-------|--------|-----|------|------|------|------|------|------|-----|
| 2.3 | influent B   | 14.01.2021 | 23.50 | 303.72 | 643 | 4790 | 2360 | 1490 | 3050 | 6540 | 1990 | 823 |
| 2.3 | cascade 2 A  | 14.01.2021 | 23.50 | 303.72 | 515 | 4810 | 1900 | 1190 | 1840 | 5340 | 1670 | 611 |
| 2.3 | cascade 2 B  | 14.01.2021 | 23.50 | 303.72 | 571 | 4990 | 2010 | 1290 | 1670 | 5660 | 1840 | 677 |
| 2.3 | cascade 4 A  | 14.01.2021 | 23.50 | 303.72 | 544 | 5430 | 1930 | 1070 | 1820 | 4720 | 1860 | 695 |
| 2.3 | cascade 4 B  | 14.01.2021 | 23.50 | 303.72 | 547 | 5430 | 1870 | 1080 | 1920 | 4650 | 1840 | 671 |
| 2.3 | cascade 6 A  | 14.01.2021 | 23.50 | 303.72 | 430 | 4160 | 1710 | 929  | 1270 | 3560 | 1490 | 610 |
| 2.3 | cascade 6 B  | 14.01.2021 | 23.50 | 303.72 | 423 | 4320 | 1700 | 908  | 1250 | 3820 | 1410 | 599 |
| 2.3 | cascade 8 A  | 14.01.2021 | 23.50 | 303.72 | 339 | 3500 | 1270 | 731  | 729  | 3370 | 1180 | 451 |
| 2.3 | cascade 8 B  | 14.01.2021 | 23.50 | 303.72 | 338 | 3310 | 1290 | 753  | 726  | 3310 | 1210 | 500 |
| 2.3 | cascade 10 A | 14.01.2021 | 23.50 | 303.72 | 285 | 3110 | 1230 | 688  | 568  | 3130 | 1010 | 426 |
| 2.3 | cascade 10 B | 14.01.2021 | 23.50 | 303.72 | 289 | 2840 | 1190 | 668  | 555  | 3170 | 1060 | 419 |
| 2.3 | cascade 12 A | 14.01.2021 | 23.50 | 303.72 | 274 | 2150 | 1180 | 636  | 354  | 2890 | 852  | 336 |
| 2.3 | cascade 12 B | 14.01.2021 | 23.50 | 303.72 | 272 | 2490 | 1070 | 606  | 367  | 3010 | 988  | 356 |

**laboratory flatcell**

| experiment variant | sample type | date       | flow rate [l/h] | irradiation power [W/m <sup>2</sup> ] | amisulpride | benzotriazole | candesartan | carbamazepine | diclofenac | gabapentin | 1-methyl-benzotriazole | metoprolol |
|--------------------|-------------|------------|-----------------|---------------------------------------|-------------|---------------|-------------|---------------|------------|------------|------------------------|------------|
| 3                  | influent A  | 25.10.2019 | -               | -                                     | 2402        | 8355          | 3966        | 3046          | 2691       | 1198       | 1803                   | 776        |
| 3                  | influent B  | 25.10.2019 | -               | -                                     | 2565        | 8512          | 3770        | 3245          | 2871       | 1295       | 1843                   | 826        |
| 3                  | influent C  | 25.10.2019 | -               | -                                     | 2504        | 9266          | 3778        | 3357          | 2764       | 1317       | 1885                   | 847        |
| 3.1                | effluent A  | 25.10.2019 | 0.99            | 159.12                                | 2075        | 2520          | 2195        | 2647          | 1370       | 1025       | 482                    | 518        |
| 3.1                | effluent B  | 25.10.2019 | 0.99            | 159.12                                | 2232        | 2803          | 2224        | 2674          | 1426       | 1173       | 582                    | 605        |
| 3.1                | effluent C  | 25.10.2019 | 0.99            | 159.12                                | 2132        | 2460          | 2253        | 2734          | 1292       | 1141       | 534                    | 573        |
| 3.2                | effluent A  | 25.10.2019 | 0.99            | 318.23                                | 1716        | 1859          | 1707        | 2240          | 1198       | 1030       | 397                    | 506        |
| 3.2                | effluent B  | 25.10.2019 | 0.99            | 318.23                                | 1824        | 1723          | 1690        | 2255          | 1057       | 906        | 376                    | 431        |
| 3.2                | effluent C  | 25.10.2019 | 0.99            | 318.23                                | 1777        | 1746          | 1646        | 2205          | 1223       | 981        | 349                    | 476        |
| 3.3                | effluent A  | 25.10.2019 | 0.99            | 477.35                                | 1654        | 1766          | 1491        | 2153          | 1021       | 1058       | 366                    | 538        |
| 3.3                | effluent B  | 25.10.2019 | 0.99            | 477.35                                | 1695        | 1780          | 1599        | 2034          | 1191       | 1019       | 312                    | 419        |
| 3.3                | effluent C  | 25.10.2019 | 0.99            | 477.35                                | 1646        | 1718          | 1528        | 2113          | 1058       | 992        | 294                    | 447        |
| 3.4                | effluent A  | 25.10.2019 | 0.99            | 636.46                                | 1708        | 1770          | 1688        | 2175          | 1046       | 887        | 354                    | 413        |
| 3.4                | effluent B  | 25.10.2019 | 0.99            | 636.46                                | 1518        | 1762          | 1557        | 2122          | 1072       | 833        | 340                    | 378        |
| 3.4                | effluent C  | 25.10.2019 | 0.99            | 636.46                                | 1624        | 1607          | 1462        | 1994          | 1095       | 848        | 297                    | 418        |

Table S3: Kinetics

**laboratory batch**

| experiment<br>variant | flow rate [l/h] | irradiation<br>power [W/m <sup>2</sup> ] | amisulpride     |                    | benzotriazole   |                    | candesartan     |                    | carbamazepine   |                    | diclofenac      |                    | gabapentin      |                    | 1-methylbenzotriazole |                    | metoprolol      |                    |
|-----------------------|-----------------|------------------------------------------|-----------------|--------------------|-----------------|--------------------|-----------------|--------------------|-----------------|--------------------|-----------------|--------------------|-----------------|--------------------|-----------------------|--------------------|-----------------|--------------------|
|                       |                 |                                          | half time [min] | R <sup>2</sup> [-] | half time [min]       | R <sup>2</sup> [-] | half time [min] | R <sup>2</sup> [-] |
| 1.1                   | -               | 99.94                                    | 87.07879153     | 0.99487            | 27.74808569     | 0.99002            | 88.41163017     | 0.98779            |                 |                    | 32.3749267      | 0.99246            | 136.7154202     | 0.97444            | 37.8355448            | 0.98959            | 88.2990039      | 0.9677             |
| 1.2                   | -               | 199.88                                   | 77.79429636     | 0.90241            | 21.59337011     | 0.98357            | 53.0740567      | 0.99474            |                 |                    | 23.70544393     | 0.95883            | 49.08974367     | 0.99234            | 27.1396703            | 0.98904            | 34.1115738      | 0.9907             |
| 1.3                   | -               | 299.82                                   | 35.47324363     | 0.97603            | 9.848638542     | 0.98366            | 34.11157385     | 0.99378            |                 |                    | 15.00968342     | 0.99478            | 40.82138873     | 0.98993            | 20.2674614            | 0.99475            | 31.7084712      | 0.98331            |

**semi technical RTK**

| experiment<br>variant | flow rate [l/h] | irradiation<br>power [W/m <sup>2</sup> ] | amisulpride     |                    | benzotriazole   |                    | candesartan     |                    | carbamazepine   |                    | diclofenac      |                    | gabapentin      |                    | 1-methylbenzotriazole |                    | metoprolol      |                    |
|-----------------------|-----------------|------------------------------------------|-----------------|--------------------|-----------------|--------------------|-----------------|--------------------|-----------------|--------------------|-----------------|--------------------|-----------------|--------------------|-----------------------|--------------------|-----------------|--------------------|
|                       |                 |                                          | half time [min] | R <sup>2</sup> [-] | half time [min]       | R <sup>2</sup> [-] | half time [min] | R <sup>2</sup> [-] |
| 2.1                   | 25.10           | 87.83                                    | 97.85704255     | 0.98293            | 137.648217      | 0.71232            | 115.8493134     | 0.94808            | 117.2452218     | 0.97925            | 26.50790286     | 0.99136            | 96.49207633     | 0.95267            | 116.595826            | 0.96861            | 96.0881864      | 0.9291             |
| 2.2                   | 23.40           | 197.89                                   | 43.86916722     | 0.99796            | 45.40055808     | 0.98296            | 53.60174383     | 0.99167            | 58.07288971     | 0.98039            | 17.46504236     | 0.99602            | 75.35256372     | 0.97006            | 51.827793             | 0.9876             | 43.2948047      | 0.98833            |
| 2.3                   | 23.50           | 303.72                                   | 52.42159144     | 0.91609            | 50.11471444     | 0.86395            | 66.31831211     | 0.91337            | 49.02087967     | 0.98759            | 28.25258897     | 0.86777            | 49.84668829     | 0.93654            | 54.9890918            | 0.98636            | 48.1915707      | 0.92438            |

**laboratory flatcell**

| experiment<br>variant | flow rate [l/h] | irradiation<br>power [W/m <sup>2</sup> ] | amisulpride     |                    | benzotriazole   |                    | candesartan     |                    | carbamazepine   |                    | diclofenac      |                    | gabapentin      |                    | 1-methylbenzotriazole |                    | metoprolol      |                    |
|-----------------------|-----------------|------------------------------------------|-----------------|--------------------|-----------------|--------------------|-----------------|--------------------|-----------------|--------------------|-----------------|--------------------|-----------------|--------------------|-----------------------|--------------------|-----------------|--------------------|
|                       |                 |                                          | half time [min] | R <sup>2</sup> [-] | half time [min]       | R <sup>2</sup> [-] | half time [min] | R <sup>2</sup> [-] |
| 3.1                   | 0.99            | 159.12                                   | 56.71           | -                  | 6.97            | -                  | 15.47           | -                  | 46.76           | -                  | 11.86           | -                  | 63.96           | -                  | 6.79                  | -                  | 23.00           | -                  |
| 3.2                   | 0.99            | 318.23                                   | 24.81           | -                  | 5.31            | -                  | 10.22           | -                  | 23.13           | -                  | 9.66            | -                  | 31.60           | -                  | 5.29                  | -                  | 15.36           | -                  |
| 3.3                   | 0.99            | 477.35                                   | 20.95           | -                  | 5.27            | -                  | 9.24            | -                  | 19.80           | -                  | 9.03            | -                  | 39.03           | -                  | 4.85                  | -                  | 15.17           | -                  |
| 3.4                   | 0.99            | 636.46                                   | 19.53           | -                  | 5.19            | -                  | 9.43            | -                  | 19.73           | -                  | 8.86            | -                  | 21.40           | -                  | 4.91                  | -                  | 11.95           | -                  |
